# Supplementary material
Source: HighWire-hosted journal article supplement (https://oem.bmj.com/content/77/2/57)
Supplement: inline-supplementary-material-1 [file inline-supplementary-material-1.pdf]

**Supplementary material****Work as welder and occupational exposure to dust and fumes and  
invasive pneumococcal disease risk**

Kjell Torén, Paul D. Blanc, Rajen N. Naidoo, Nicola Murgia, Ingemar Qvarfordt, Olov  
Aspevall, Anna Dahlman-Höglund, Linus Schiöler

**Supplementary material;****Table A. The following drugs were captured using the following codes;**

- a. Pneumococcal vaccination was defined as ATC code J07A L01, J07A L02 and J07A L52.
- b. Drugs used in alcohol dependence were defined as ATC code N07BB comprising disulfiram, calcium carbimide, acamprosate, naltrexone and nalmefene.

**Table B. Occupations classified as high exposed to inorganic dust.**

| <b>ISCO code</b> | <b>Occupation</b>                |
|------------------|----------------------------------|
| 7111             | Miners and quarry workers        |
| 7112             | Shotfires and blasters           |
| 7113             | Stone splitters and carvers      |
| 7123             | Concrete workers                 |
| 7134             | Insulation workers               |
| 8110             | Mining-plant operators           |
| 8112             | Mineral-ore and stone processors |
| 8121             | Ore and metal furnace processors |
| 9311             | Mining and quarrying labourers   |

**Table C. Occupations classified as high exposed to silica dust**

| <b>ISCO code</b> | <b>Occupation</b>                |
|------------------|----------------------------------|
| 7111             | Miners and quarry workers        |
| 7112             | Shotfires and blasters           |
| 7113             | Stone splitters and carvers      |
| 7123             | Concrete workers                 |
| 8110             | Mining-plant operators           |
| 8112             | Mineral-ore and stone processors |
| 9311             | Mining and quarrying labourers   |

**Table D. Occupations classified as high exposed to fumes**

| <b>ISCO code</b> | <b>Occupation</b>               |
|------------------|---------------------------------|
| 5161             | Firefighters                    |
| 7112             | Shotfires and blasters          |
| 7142             | Varnishers and related painters |
| 7210             | Metal moulders                  |
| 7212             | Welders and flamecutters        |
| 8273             | Baked-goods machine operators   |
| 9311             | Mining and quarrying labourers  |

**Table E. Occupations classified as high exposed to vapors and gases**

| <b>ISCO code</b> | <b>Occupation</b>           |
|------------------|-----------------------------|
| 7143             | Building structure cleaners |
| 7212             | Welders and flamecutters    |

8142 Paper and pulp plant operators

**Table F. Occupations classified as high exposed to organic dust**

| <b>ISCO code</b> | <b>Occupation</b>                          |
|------------------|--------------------------------------------|
| 6122             | Poultry producers                          |
| 7412             | Bakers and pastry-cooks                    |
| 8273             | Grain- and spice-milling machine operators |
| 8274             | Baked-goods machine operators              |

**Table G. Logistic regression models for invasive pneumococcal disease (IPD) risk without pneumonia in relation to occupational exposure defined by job-exposure matrix to vapors and gases, inorganic dust, silica dust, fumes, silica dust and organic dust during the year preceding the index date (onset of IPD).**

| Occupational exposures              | Invasive pneumococcal disease (IPD) without pneumonia<br>N=1295 |             |
|-------------------------------------|-----------------------------------------------------------------|-------------|
|                                     | OR                                                              | 95% CI      |
| <b>Fumes<br/>(n=836)</b>            | 0.99                                                            | 0.83-1.18   |
| <b>Inorganic dust<br/>(n=1024)</b>  | 1.10                                                            | 0.91-1.33   |
| <b>Silica dust<br/>(n=208)</b>      | 1.30                                                            | 0.95-1.79   |
| <b>Vapors and gases<br/>(n=963)</b> | 0.97                                                            | 0.80 – 1.17 |
| <b>Organic dust<br/>(n=362)</b>     | 1.11                                                            | 0.88 – 1.40 |

Matched for gender, age and place of residency, and adjusted for educational level, ethanol abuse, and diagnoses of COPD, asthma and diabetes and any other occupational exposures;

**Table H. Logistic regression models of invasive pneumococcal disease (IPD) risk and IPD with pneumonia in relation to occupational exposure to vapors and gases, inorganic dust, silica dust, fumes, silica dust and organic dust during the year preceding the index date (onset of IPD). All metalworkers are *excluded*.**

| Occupational exposures  | Invasive pneumococcal disease (IPD) |             |                                |           |
|-------------------------|-------------------------------------|-------------|--------------------------------|-----------|
|                         | All IPD<br>(N= 4353)                |             | IPD with pneumonia<br>(N=3070) |           |
|                         | OR                                  | 95% CI      | OR                             | 95% CI    |
| <b>Fumes</b>            |                                     |             |                                |           |
| All <sup>1</sup>        | 1.05                                | 0.95-1.16   | 1.08                           | 0.96-1.21 |
| Low <sup>1</sup>        | 1.05                                | 0.95-1.16   | 1.08                           | 0.96-1.21 |
| High <sup>1</sup>       | 0.87                                | 0.36-2.13   | 1.10                           | 0.44-2.78 |
| <b>Inorganic dust</b>   |                                     |             |                                |           |
| All <sup>1</sup>        | 1.05                                | 0.95 – 1.17 | 1.03                           | 0.91-1.17 |
| Low <sup>1</sup>        | 1.05                                | 0.90 – 2.35 | 1.03                           | 0.91-1.16 |
| High <sup>1</sup>       | 1.45                                | 0.90 -2.35  | 1.32                           | 0.76-2.30 |
| <b>Silica dust</b>      |                                     |             |                                |           |
| All <sup>1</sup>        | 1.35                                | 1.12-1.61   | 1.33                           | 1.07-1.66 |
| Low <sup>1</sup>        | 1.32                                | 1.09-1.60   | 1.32                           | 1.05-1.67 |
| High <sup>1</sup>       | 1.56                                | 0.94-2.59   | 1.40                           | 0.77-2.53 |
| <b>Vapors and gases</b> |                                     |             |                                |           |
| All <sup>1</sup>        | 0.93                                | 0.84 – 1.03 | 0.92                           | 0.82-1.05 |
| Low <sup>1</sup>        | 0.93                                | 0.84 – 1.03 | 0.92                           | 0.81-1.04 |
| High <sup>1</sup>       | 1.13                                | 0.65 - 1.97 | 1.11                           | 0.58-2.13 |
| <b>Organic dust</b>     |                                     |             |                                |           |
| All <sup>1</sup>        | 0.95                                | 0.84-1.09   | 0.89                           | 0.76-1.04 |
| Low <sup>1</sup>        | 0.95                                | 0.83-1.08   | 0.88                           | 0.75-1.04 |
| High <sup>1</sup>       | 1.17                                | 0.62-2.20   | 1.09                           | 0.50-2.38 |

1. Matched for gender, age and place of residency, and adjusted for educational level, ethanol abuse, and diagnoses of COPD, asthma and diabetes and other occupational exposures;
